# Supplementary material for: Mutational analysis of SARS-CoV-2 variants of concern reveals key tradeoffs between receptor affinity and antibody escape
Source: PubMed Central journal article supplement (PMC9223403; doi:10.1371/journal.pcbi.1010160), 2022-05-31
Supplement: pcbi.1010160.s002.pdf [file pcbi.1010160.s002.pdf]

**Table S2. Summary of featurization vectors.** Feature vectors used in work include (A) one-hot-encoded features, (B) biophysical descriptors, and (C) amino acid index features. Biophysical descriptors and amino acid index values were chosen to represent a wide variety of physicochemical properties while exhibiting low degrees of correlation. RBD sequences were transformed into a matrix of the feature vectors representing the amino acid present at each RBD site. The matrices were then flattened for a final feature set of 1x4020 numerical values.

A

| Residue | Feature Vector |   |   |   |   |   |   |   |   |   |   |   |   |   |   |   |   |   |   |   |
|---------|----------------|---|---|---|---|---|---|---|---|---|---|---|---|---|---|---|---|---|---|---|
| A       | 1              | 0 | 0 | 0 | 0 | 0 | 0 | 0 | 0 | 0 | 0 | 0 | 0 | 0 | 0 | 0 | 0 | 0 | 0 | 0 |
| C       | 0              | 1 | 0 | 0 | 0 | 0 | 0 | 0 | 0 | 0 | 0 | 0 | 0 | 0 | 0 | 0 | 0 | 0 | 0 | 0 |
| D       | 0              | 0 | 1 | 0 | 0 | 0 | 0 | 0 | 0 | 0 | 0 | 0 | 0 | 0 | 0 | 0 | 0 | 0 | 0 | 0 |
| E       | 0              | 0 | 0 | 1 | 0 | 0 | 0 | 0 | 0 | 0 | 0 | 0 | 0 | 0 | 0 | 0 | 0 | 0 | 0 | 0 |
| F       | 0              | 0 | 0 | 0 | 1 | 0 | 0 | 0 | 0 | 0 | 0 | 0 | 0 | 0 | 0 | 0 | 0 | 0 | 0 | 0 |
| G       | 0              | 0 | 0 | 0 | 0 | 1 | 0 | 0 | 0 | 0 | 0 | 0 | 0 | 0 | 0 | 0 | 0 | 0 | 0 | 0 |
| H       | 0              | 0 | 0 | 0 | 0 | 0 | 1 | 0 | 0 | 0 | 0 | 0 | 0 | 0 | 0 | 0 | 0 | 0 | 0 | 0 |
| I       | 0              | 0 | 0 | 0 | 0 | 0 | 0 | 1 | 0 | 0 | 0 | 0 | 0 | 0 | 0 | 0 | 0 | 0 | 0 | 0 |
| K       | 0              | 0 | 0 | 0 | 0 | 0 | 0 | 0 | 1 | 0 | 0 | 0 | 0 | 0 | 0 | 0 | 0 | 0 | 0 | 0 |
| L       | 0              | 0 | 0 | 0 | 0 | 0 | 0 | 0 | 0 | 1 | 0 | 0 | 0 | 0 | 0 | 0 | 0 | 0 | 0 | 0 |
| M       | 0              | 0 | 0 | 0 | 0 | 0 | 0 | 0 | 0 | 0 | 1 | 0 | 0 | 0 | 0 | 0 | 0 | 0 | 0 | 0 |
| N       | 0              | 0 | 0 | 0 | 0 | 0 | 0 | 0 | 0 | 0 | 0 | 1 | 0 | 0 | 0 | 0 | 0 | 0 | 0 | 0 |
| P       | 0              | 0 | 0 | 0 | 0 | 0 | 0 | 0 | 0 | 0 | 0 | 0 | 1 | 0 | 0 | 0 | 0 | 0 | 0 | 0 |
| Q       | 0              | 0 | 0 | 0 | 0 | 0 | 0 | 0 | 0 | 0 | 0 | 0 | 0 | 1 | 0 | 0 | 0 | 0 | 0 | 0 |
| R       | 0              | 0 | 0 | 0 | 0 | 0 | 0 | 0 | 0 | 0 | 0 | 0 | 0 | 0 | 1 | 0 | 0 | 0 | 0 | 0 |
| S       | 0              | 0 | 0 | 0 | 0 | 0 | 0 | 0 | 0 | 0 | 0 | 0 | 0 | 0 | 0 | 1 | 0 | 0 | 0 | 0 |
| T       | 0              | 0 | 0 | 0 | 0 | 0 | 0 | 0 | 0 | 0 | 0 | 0 | 0 | 0 | 0 | 0 | 1 | 0 | 0 | 0 |
| V       | 0              | 0 | 0 | 0 | 0 | 0 | 0 | 0 | 0 | 0 | 0 | 0 | 0 | 0 | 0 | 0 | 0 | 1 | 0 | 0 |
| W       | 0              | 0 | 0 | 0 | 0 | 0 | 0 | 0 | 0 | 0 | 0 | 0 | 0 | 0 | 0 | 0 | 0 | 0 | 0 | 1 |
| Y       | 0              | 0 | 0 | 0 | 0 | 0 | 0 | 0 | 0 | 0 | 0 | 0 | 0 | 0 | 0 | 0 | 0 | 0 | 0 | 1 |

B

| Residue | Positive charge | Negative charge | Hydropathy score | pI   | # Side chain atoms | Hydrogen bond D/A |
|---------|-----------------|-----------------|------------------|------|--------------------|-------------------|
| A       | 0               | 0               | 1.8              | 6.0  | 1                  | 0                 |
| C       | 0               | 0               | 2.5              | 5.1  | 2                  | 0                 |
| D       | 0               | 1               | -3.5             | 2.8  | 4                  | 1                 |
| E       | 0               | 1               | -3.5             | 3.2  | 5                  | 1                 |
| F       | 0               | 0               | 2.8              | 5.5  | 7                  | 0                 |
| G       | 0               | 0               | -0.4             | 6.0  | 0                  | 0                 |
| H       | 1               | 0               | -3.2             | 7.6  | 6                  | 1                 |
| I       | 0               | 0               | 4.5              | 6.0  | 4                  | 0                 |
| K       | 1               | 0               | -3.9             | 9.7  | 5                  | 1                 |
| L       | 0               | 0               | 3.8              | 6.0  | 4                  | 0                 |
| M       | 0               | 0               | 1.9              | 5.7  | 4                  | 0                 |
| N       | 0               | 0               | -3.5             | 5.4  | 4                  | 0                 |
| P       | 0               | 0               | -1.6             | 6.5  | 3                  | 0                 |
| Q       | 0               | 0               | -3.5             | 5.7  | 5                  | 0                 |
| R       | 1               | 0               | -4.5             | 10.8 | 7                  | 0                 |
| S       | 0               | 0               | -0.8             | 5.7  | 2                  | 1                 |
| T       | 0               | 0               | -0.7             | 5.9  | 3                  | 1                 |
| V       | 0               | 0               | 4.2              | 6.0  | 3                  | 0                 |
| W       | 0               | 0               | -0.9             | 6.0  | 10                 | 0                 |
| Y       | 0               | 0               | -1.3             | 5.7  | 8                  | 1                 |

C

| Residue | CHOC760102                                |                              |                                                   |                                     |                                          |                                                               |                                                     |                                                          |
|---------|-------------------------------------------|------------------------------|---------------------------------------------------|-------------------------------------|------------------------------------------|---------------------------------------------------------------|-----------------------------------------------------|----------------------------------------------------------|
|         | BHAR880101<br>Average flexibility indices | BIGC670101<br>residue volume | Residue accessible surface area in folded protein | EISD860101<br>Solvation free energy | CHAM830107<br>charge transfer capability | CHAM830108<br>A parameter of charge transfer donor capability | KANM800101<br>Average relative probability of helix | KANM800102<br>Average relative probability of beta-sheet |
| A       | 0.357                                     | 52.6                         | 25.0                                              | 0.7                                 | 0.0                                      | 0.0                                                           | 1.36                                                | 0.81                                                     |
| C       | 0.365                                     | 102                          | 23.0                                              | 1.9                                 | 0.0                                      | 0.0                                                           | 1.21                                                | 1.24                                                     |
| D       | 0.529                                     | 109.1                        | 90.0                                              | -2.1                                | 0.0                                      | 1.0                                                           | 1                                                   | 0.85                                                     |
| E       | 0.466                                     | 105.1                        | 97.0                                              | -0.6                                | 0.0                                      | 1.0                                                           | 1.22                                                | 0.77                                                     |
| F       | 0.463                                     | 75.7                         | 63.0                                              | -0.6                                | 1.0                                      | 1.0                                                           | 0.89                                                | 0.62                                                     |
| G       | 0.295                                     | 97.7                         | 31.0                                              | 2.4                                 | 0.0                                      | 1.0                                                           | 1.45                                                | 1.05                                                     |
| H       | 0.511                                     | 68.4                         | 50.0                                              | -1.2                                | 1.0                                      | 0.0                                                           | 1.04                                                | 0.71                                                     |
| I       | 0.314                                     | 113.9                        | 24.0                                              | 2.3                                 | 0.0                                      | 1.0                                                           | 1.05                                                | 1.2                                                      |
| K       | 0.346                                     | 68.3                         | 19.0                                              | 0.4                                 | 0.0                                      | 1.0                                                           | 0.82                                                | 1.17                                                     |
| L       | 0.509                                     | 73.6                         | 50.0                                              | 1.2                                 | 0.0                                      | 0.0                                                           | 0.52                                                | 0.61                                                     |
| M       | 0.493                                     | 89.7                         | 71.0                                              | -0.2                                | 0.0                                      | 1.0                                                           | 1.14                                                | 0.98                                                     |
| N       | 0.507                                     | 54.9                         | 44.0                                              | 0.0                                 | 0.0                                      | 0.0                                                           | 0.74                                                | 0.92                                                     |
| P       | 0.497                                     | 84.7                         | 49.0                                              | -0.8                                | 1.0                                      | 0.0                                                           | 1.48                                                | 0.53                                                     |
| Q       | 0.444                                     | 71.2                         | 47.0                                              | 0.5                                 | 0.0                                      | 0.0                                                           | 0.81                                                | 1.18                                                     |
| R       | 0.544                                     | 36.3                         | 23.0                                              | 0.0                                 | 1.0                                      | 0.0                                                           | 0.63                                                | 0.88                                                     |
| S       | 0.305                                     | 135.4                        | 32.0                                              | 2.6                                 | 0.0                                      | 1.0                                                           | 0.97                                                | 1.18                                                     |
| T       | 0.323                                     | 91.9                         | 43.0                                              | 0.6                                 | 0.0                                      | 1.0                                                           | 1.11                                                | 0.92                                                     |
| V       | 0.42                                      | 116.2                        | 60.0                                              | 1.6                                 | 0.0                                      | 1.0                                                           | 0.79                                                | 1.23                                                     |
| W       | 0.462                                     | 102                          | 18.0                                              | 1.9                                 | 0.0                                      | 0.0                                                           | 1.08                                                | 1.48                                                     |
| Y       | 0.386                                     | 85.1                         | 18.0                                              | 1.5                                 | 0.0                                      | 0.0                                                           | 0.94                                                | 1.66                                                     |
