# Supplementary material for: Mutational analysis of SARS-CoV-2 variants of concern reveals key tradeoffs between receptor affinity and antibody escape
Source: PubMed Central journal article supplement (PMC9223403; doi:10.1371/journal.pcbi.1010160), 2022-05-31
Supplement: pcbi.1010160.s003.pdf [file pcbi.1010160.s003.pdf]

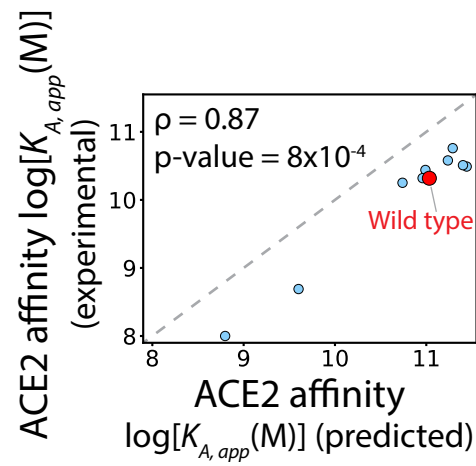

**Figure S1. Ridge Regression model predictions of ACE2 affinity for single RBD mutants are correlated with conventional ACE2 affinity measurements.** Predicted binding strengths of ACE2 (Ridge Regression model with one-hot encoded features) are correlated with conventional measurements of ACE2 affinity for single RBD mutants reported previously (Starr et al. *Cell*, 2020).
