# Supplementary material for: Mutational analysis of SARS-CoV-2 variants of concern reveals key tradeoffs between receptor affinity and antibody escape
Source: PubMed Central journal article supplement (PMC9223403; doi:10.1371/journal.pcbi.1010160), 2022-05-31
Supplement: pcbi.1010160.s004.pdf [file pcbi.1010160.s004.pdf]

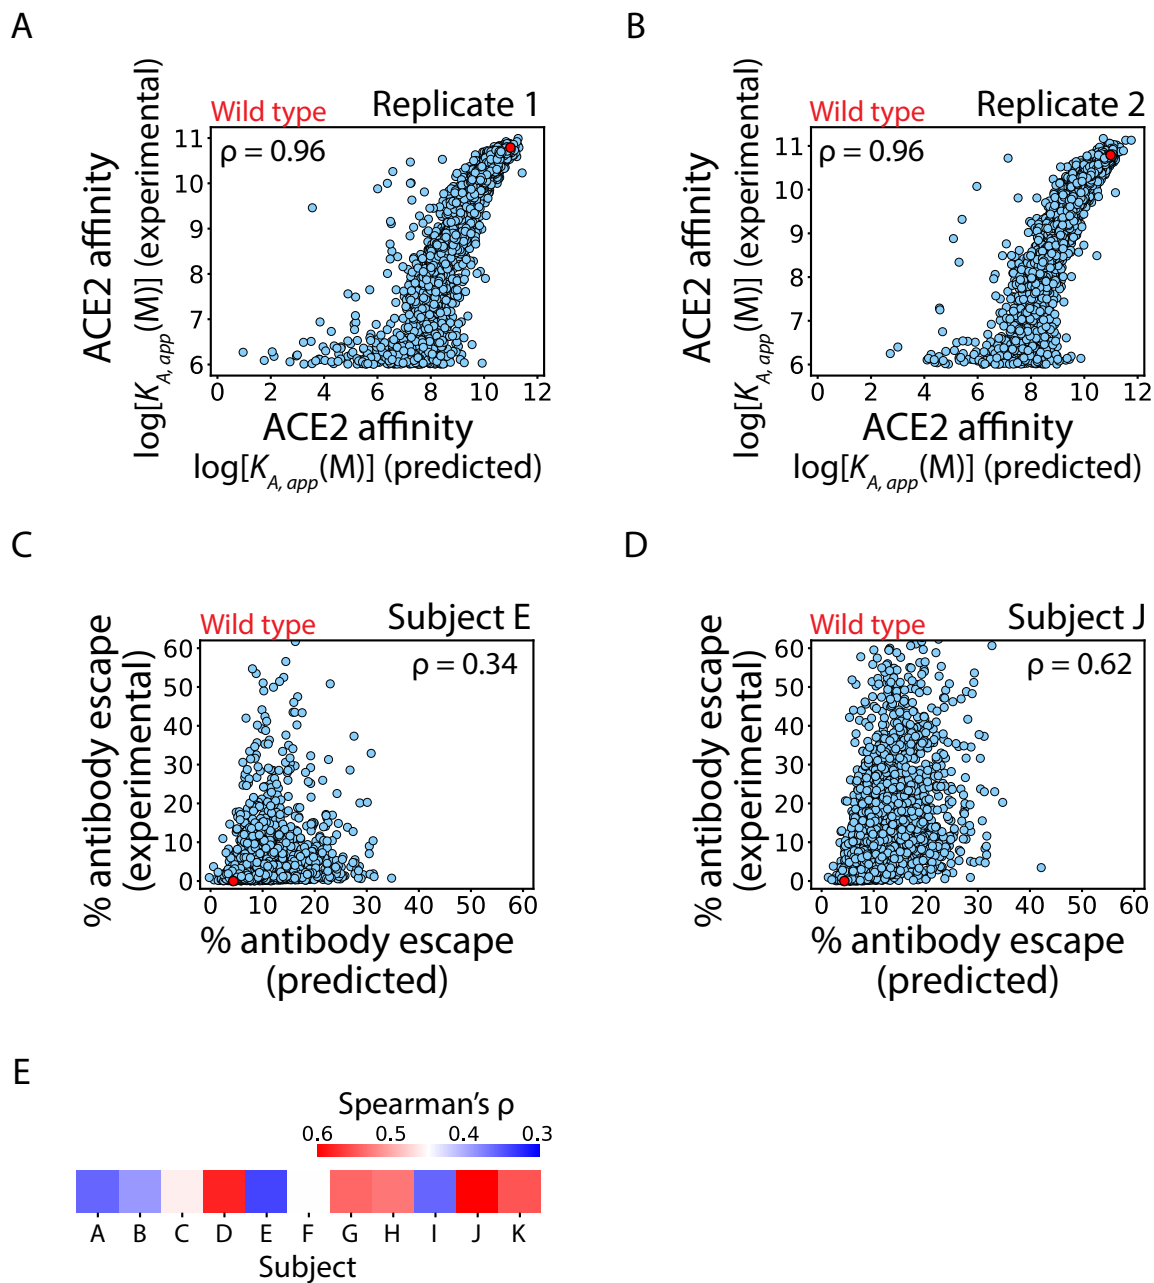

**Figure S2. Evaluation of model performance for different biological replicates (ACE2 affinity) and human samples (antibody escape).** (A-B) Model displays similar performance (Spearman's  $\rho$  values) in predicting ACE2 affinities for RBD mutants from two biological (experimental) replicates. (C-E) Model predicts % antibody escape for antibody samples obtained from different convalescent patients with different Spearman's  $\rho$  values. In (C), the worst model performance for predicting % antibody escape from one of the 11 human samples (subject E) is reported. In (D), the best model performance for predicting % antibody escape from one of the 11 human samples (subject J) is reported. In (E), the range of model performances (Spearman's  $\rho$  values) for predicting % antibody escape is reported for the 11 human samples.
